# Supplementary material
Source: PubMed Central journal article supplement (PMC3675822)
Supplement: supp_M112.021733_mcp.M112.021733-2.pdf [file supp_M112.021733_mcp.M112.021733-2.pdf]

Figure S1. MS/MS spectra of peptides with PTMs.

Figure S2. Labeling efficiencies of four representative  $^{15}\text{N}$ -histone H3 peptides.

To evaluate the incorporation of  $^{15}\text{N}$ , unpropionylated  $^{15}\text{N}$ -labeled H3 was digested with trypsin and ratios of H/L were quantified using Mascot Distiller. Analysis of raw MS spectra showed at least 99% incorporation suggesting that the labeling process was highly efficient.

Figure S3. Mass analysis of WT and  $^{15}\text{N}$  intact histone H3 illustrating similar profiles and complexity of PTMs.
