# Supplementary material
Source: PubMed Central journal article supplement (PMC3675822)
Supplement: supp_M112.021733_mcp.M112.021733-4.pdf [file supp_M112.021733_mcp.M112.021733-4.pdf]

**Table S1. False discovery rate, number of PTMs identified and sequence coverage in WT and  $\Delta TXR1$  cells**

|                                      |            |      |      |
|--------------------------------------|------------|------|------|
| FDR (identity, %)                    | 0.64(0.51) |      |      |
| FDR (homology, %)                    | 2.36(0.38) |      |      |
| H3 isoforms                          | H3         | H3.3 | H3.4 |
| Sequence Coverage                    | 76%        | 76%  | 76%  |
| # Peptides Statistically Quantified* | 42         | 22   | N/A  |
| # PTMs Identified                    | 20         | 10   | 2    |
| # PTMs Statistically Quantified*     | 12         | 6    | 0    |

\*: number of peptides/PTMs statistically quantified means that those peptides are presented at least twice in replicate wild-type or knockout cells.

**Table S2. Summary of valid diagnostic peptides and PTMs quantified in variant H3.3 for *TXR1* mutant.**

|             |     |                        |                                           |   |                      | WT/ <sup>15</sup> N WT | <i>TXR1</i> / <sup>15</sup> N WT |          | Final ratio     | Normalized      |
|-------------|-----|------------------------|-------------------------------------------|---|----------------------|------------------------|----------------------------------|----------|-----------------|-----------------|
|             |     |                        |                                           |   |                      | Mean (SD)              | Mean (SD)                        | p-value* | <i>TXR1</i> /WT | <i>TXR1</i> /WT |
|             |     |                        |                                           |   |                      | Protein-level Ratio**  |                                  |          |                 |                 |
| <b>H3.3</b> |     |                        |                                           |   |                      | 0.78 (0.09)            | 1.41(0.15)                       | 0.007    | 1.81            | 2.53            |
| start       | end | Sequence               | Modifications                             | z | Peptide-level Ratios |                        |                                  |          |                 |                 |
| 9           | 17  | KSTGVKAPR              | Pr(N-term,K9,K14)                         | 1 | 0.57 (0.14)          | 0.72 (0.06)            | 0.199274                         | 1.26     | 2.01            |                 |
| 18          | 26  | KQLATKAAR              | Pr(N-term, K23)                           | 2 | 0.64 (0.15)          | 1.06 (0.07)            | 0.023676                         | 1.66     | 2.38            |                 |
| 18          | 26  | KQLATKAAR              | Ac(K18,K23);Pr(N-term)                    | 2 | 0.99 (0.03)          | 0.96 (0.11)            | 0.677255                         | 0.97     | 1.35            |                 |
| 18          | 26  | KQLATKAAR              | Ac(K23); Pr(N-term,K18)                   | 1 | 2.29 (1.49)          | 0.8 (0.03)             | 0.39201                          | 0.35     | 0.56            |                 |
|             |     |                        |                                           | 2 | 1.20 (0.05)          | 0.96 (0.17)            | 0.118136                         | 0.8      | 1.11            |                 |
| 18          | 26  | KQLATKAAR              | Pr(N-term,K18,K23)                        | 1 | 0.47 (0.13)          | 0.82 (0.04)            | 0.033675                         | 1.76     | 2.5             |                 |
|             |     |                        |                                           | 2 | 0.59 (0.14)          | 1.05 (0.06)            | 0.020046                         | 1.78     | 2.53            |                 |
| 27          | 49  | KSAPVSGGVKKPHKFRPGTVLR | Pr(N-term,K36,K37,K40)                    | 3 | 0.83 (0.02)          | 3.81 (0.1)             | 0.000174                         | 4.62     | 6.5             |                 |
|             |     |                        |                                           | 4 | 0.84 (0.01)          | 3.89 (0.03)            | 1.80E-06                         | 4.66     | 6.59            |                 |
| 27          | 49  | KSAPVSGGVKKPHKFRPGTVLR | Me1(K27);Pr(N-term,K36,K37,K40)           | 3 | 0.73 (0.15)          | 0.2 (0.02)             | 0.025915                         | 0.27     | 0.39            |                 |
| 27          | 49  | KSAPVSGGVKKPHKFRPGTVLR | Me1(K27);Pr(N-term,K27, K36,K37,K40)      | 3 | 0.73 (0.15)          | 0.22 (0.01)            | 0.028321                         | 0.3      | 0.43            |                 |
| 27          | 49  | KSAPVSGGVKKPHKFRPGTVLR | Me1(K27);Me1(K36);Pr(N-term, K36,K37,K40) | 4 | 0.55 (0.12)          | 0.17 (0.09)            | 0.029351                         | 0.3      | 0.43            |                 |
| 27          | 49  | KSAPVSGGVKKPHKFRPGTVLR | Ac(K37);Me1(K36);Pr(N-term,K36,K40)       | 3 | 0.84 (0)             | 3.86 (0.06)            | 0.009465                         | 4.6      | 6.04            |                 |
|             |     |                        |                                           | 4 | 0.85 (0.01)          | 3.89 (0.04)            | 0.005618                         | 4.58     | 6.04            |                 |
| 53          | 63  | KYQKTTDLLIR            | Ac(K56);Pr(N-term)                        | 2 | 1.25 (0.12)          | 1 (0.15)               | 0.093929                         | 0.8      | 1.11            |                 |
| 53          | 63  | KYQKTTDLLIR            | Pr(N-term,K56)                            | 2 | 0.66 (0.14)          | 1.17 (0.04)            | 0.018789                         | 1.76     | 2.49            |                 |
| 53          | 63  | KYQKTTDLLIR            | Pr(N-term,K1,K56)                         | 2 | 0.68 (0.13)          | 1.18 (0.03)            | 0.01697                          | 1.74     | 2.77            |                 |
| 73          | 83  | DIAMEMKSDIR            | Pr(N-term,K79)                            | 2 | 0.61 (0.19)          | 1.22 (0.04)            | 0.027935                         | 2        | 2.83            |                 |
| 116         | 128 | RVTIMTKDLHLAR          | Pr(N-term,K122)                           | 2 | 0.60 (0.25)          | 1.17 (0.08)            | 0.047206                         | 1.94     | 2.77            |                 |
|             |     |                        |                                           | 3 | 0.58 (0.23)          | 1.16 (0.05)            | 0.042797                         | 2.01     | 2.87            |                 |
| 117         | 128 | VTIMTKDLHLAR           | Pr(N-term,K122)                           | 2 | 0.64 (0.21)          | 1.27(0.06)             | 0.027222                         | 1.98     | 2.8             |                 |
| 117         | 129 | VTIMTKDLHLARR          | Pr(N-term,K122)                           | 2 | 0.48 (0.08)          | 1.11 (0.07)            | 0.013342                         | 2.33     | 3.68            |                 |

\* Species with significant p-values (p <0.05) are boxed. The p-value is calculated from peptides which are present at least twice in replicate WT or KO cells. The average CV for peptides from histone H3.3 in WT and *TXR1* knockout cells is 17.9% and 6.3% respectively.

\*\* Protein Ratios are calculated from diagnostic peptides to H3.3.

**Table S3. Summary of all PTMs identified in WT and knockout cells**

| <b>H3 major</b> |     |                         |                        |   |          |              |           |           |         |
|-----------------|-----|-------------------------|------------------------|---|----------|--------------|-----------|-----------|---------|
| Start           | End | Sequence                | Modifications          | z | Observed | $\Delta M^*$ | Ion Score | Intensity | RT(min) |
| 3               | 8   | TKQTAR                  | K4Me1                  | 2 | 387.7275 | 1            | 37        | 9.46E03   | 41.1    |
| 9               | 17  | KSTGAKAPR               | K9Ac                   | 2 | 542.2835 | 1            | 29        | 5.49E04   | 53.6    |
| 9               | 17  | KSTGAKAPR               | K14Ac                  | 2 | 514.2699 | 0            | 63        | 3.51E04   | 48.4    |
| 9               | 17  | KSTGAKAPR               | K14Me1                 | 2 | 556.2968 | -3           | 42        | 5.96E05   | 64.6    |
| 18              | 26  | KQLASKAAR               | K18Ac                  | 2 | 571.3108 | 1            | 47        | 2.10E05   | 78.1    |
| 18              | 26  | KQLASKAAR               | K18Ac, K23Ac           | 2 | 556.8246 | 0            | 56        | 3.10E05   | 74.5    |
| 18              | 26  | KQLASKAAR               | K23Ac                  | 2 | 563.8319 | -1           | 57        | 2.31E05   | 78.1    |
| 18              | 26  | KQLASKAAR               | K23Me1                 | 2 | 557.3122 | -1           | 53        | 3.60E05   | 61.9    |
| 18              | 26  | KQLASKAAR               | K23Me2                 | 2 | 556.8409 | -4           | 28        | 8.62E05   | 71.4    |
| 18              | 26  | KQLASKAAR               | K23Me3                 | 2 | 571.3286 | 0            | 34        | 2.37E05   | 69.9    |
| 27              | 40  | KSAPATGGIKKPHR          | K27Me1                 | 2 | 815.476  | 1            | 83        | 8.13E05   | 70.9    |
| 27              | 40  | KSAPATGGIKKPHR          | K27Me2                 | 2 | 822.4858 | 3            | 96        | 2.59E04   | 63.1    |
| 27              | 40  | KSAPATGGIKKPHR          | K27Me3                 | 2 | 829.4924 | 2            | 62        | 2.58E04   | 64.1    |
| 27              | 40  | KSAPATGGIKKPHR          | K27Ac                  | 2 | 829.474  | 1            | 74        | 6.57E05   | 69.3    |
| 27              | 40  | KSAPATGGIKKPHR          | K27Me1, K36Me1         | 2 | 850.4947 | -2           | 86        | 3.06E04   | 77.5    |
| 27              | 40  | KSAPATGGIKKPHR          | K27Me2, K36Me1         | 2 | 840.4605 | 2            | 72        | 5.64E04   | 67.5    |
| 27              | 40  | KSAPATGGIKKPHR          | K27Me1, K36Me2         | 2 | 829.4922 | 1            | 67        | 1.02E05   | 72.4    |
| 27              | 40  | KSAPATGGIKKPHR          | K27Ac, K36Me2          | 2 | 815.4771 | 2            | 62        | 1.56E04   | 62.9    |
| 27              | 49  | KSAPATGGIKKPHRFRPGTVALR | K27Me1, R40Me2         | 3 | 885.8521 | -3           | 59        | 3.03E05   | 82.8    |
| 27              | 49  | KSAPATGGIKKPHRFRPGTVALR | K27Me1, K36Me1, R40Me2 | 3 | 890.5257 | -4           | 64        | 1.33E05   | 83.1    |
| 27              | 40  | KSAPATGGIKKPHR          | K27Me1, K36Me1, K37Me3 | 2 | 843.5031 | -4           | 60        | 9.49E04   | 80.8    |
| 27              | 40  | KSAPATGGIKKPHR          | K36Me1                 | 2 | 843.4901 | 2            | 83        | 1.46E05   | 74.3    |
| 27              | 40  | KSAPATGGIKKPHR          | K36Me2                 | 2 | 794.4721 | 3            | 55        | 1.23E05   | 63.3    |
| 53              | 63  | KYQKSTDLLIR             | K56Me1                 | 2 | 745.9297 | -4           | 67        | 1.23E06   | 84.9    |
| 73              | 83  | DIAHEFKAELR             | K79Me1                 | 2 | 727.8858 | 0            | 57        | 1.62E05   | 105.1   |
| 73              | 83  | DIAHEFKAELR             | R83Me1                 | 2 | 727.8863 | 1            | 54        | 1.16E05   | 107.1   |
| <b>H3.3</b>     |     |                         |                        |   |          |              |           |           |         |
| 9               | 17  | KSTGVKAPR               | K9Ac, K14Ac            | 2 | 549.2912 | 1            | 45        | 2.86E05   | 56.4    |

|             |    |                            |                |   |           |    |     |         |      |
|-------------|----|----------------------------|----------------|---|-----------|----|-----|---------|------|
| 9           | 17 | KSTGVKAPR                  | K14Ac          | 2 | 556.2992  | 1  | 47  | 8.09E05 | 65.6 |
| 18          | 26 | KQLATKAAR                  | K18Ac, K23Ac   | 2 | 563.8322  | -1 | 56  | 6.56E05 | 78.7 |
| 18          | 26 | KQLATKAAR                  | K23Ac          | 2 | 570.8404  | 0  | 57  | 1.39E05 | 93.2 |
| 18          | 26 | KQLATKAAR                  | K23Me2         | 2 | 571.329   | 1  | 48  | 5.44E05 | 73.6 |
| 27          | 49 | KSAPVSGGVKKPHKFRPGTVALR    | K27Me1         | 3 | 885.8548  | 2  | 121 | 3.09E05 | 84.9 |
| 27          | 49 | KSAPVSGGVKKPHKFRPGTVALR    | K27Me2         | 4 | 668.1464  | 1  | 63  | 6.54E05 | 79.2 |
| 27          | 49 | KSAPVSGGVKKPHKFRPGTVALR    | K36Me1         | 3 | 904.5299  | 1  | 77  | 1.89E05 | 88.9 |
| 27          | 49 | KSAPVSGGVKKPHKFRPGTVALR    | K36Me2         | 3 | 871.8516  | 2  | 58  | 3.46E04 | 79.5 |
| 27          | 49 | KSAPVSGGVKKPHKFRPGTVALR    | K27Me1, K36Me1 | 3 | 890.5257  | 0  | 118 | 1.33E05 | 83.1 |
| 27          | 52 | KSAPVSGGVKKPHKFRPGTVALREIR | K36Me1, K37Ac  | 3 | 1013.9262 | 2  | 52  | 1.37E05 | 85.0 |
| 28          | 49 | SAPVSGGVKKPHKFRPGTVALR     | K36Ac, K37Me1  | 3 | 838.4809  | -3 | 59  | 2.65E04 | 84.8 |
| 53          | 63 | KYQKTTDLLIR                | K56Ac          | 2 | 738.9255  | 1  | 74  | 6.51E04 | 93.1 |
| <b>H3.4</b> |    |                            |                |   |           |    |     |         |      |
| 27          | 49 | KSAPISGGIKKPHKFRPGTVALR    | K36Ac          | 3 | 904.5299  | 1  | 55  | 1.89E05 | 89.0 |
| 27          | 49 | KSAPISGGIKKPHKFRPGTVALR    | K36Me1         | 3 | 895.1992  | 2  | 41  | 2.28E04 | 87.1 |

\*: Mass error is measured as parts per million (ppm).

**Table S4. Full list of all <sup>15</sup>N H3 peptide ratios (Heavy vs Light)****H3**

| Start | End | Sequence       | Modifications     | z | H/L      |
|-------|-----|----------------|-------------------|---|----------|
| 9     | 17  | KSTGAKAPR      | Ac(K14)           | 2 | 0.94451  |
| 10    | 17  | STGAKAPR       | Ac(K14)           | 2 | 0.999426 |
| 18    | 26  | KQLASKAAR      | Ac(K18,K23)       | 1 | 0.992764 |
| 18    | 26  | KQLASKAAR      | Ac(K23)           | 2 | 0.994031 |
| 18    | 26  | KQLASKAAR      | Me2(K23)          | 2 | 0.999974 |
| 18    | 26  | KQLASKAAR      | Me3(K23)          | 2 | 0.998306 |
| 19    | 26  | QLASKAAR       | Ac(K23)           | 2 | 0.97774  |
| 27    | 36  | KSAPATGGIK     | Ac(K27)           | 1 | 0.999981 |
| 27    | 36  | KSAPATGGIK     | Me2(K27)          | 2 | 0.98534  |
| 27    | 36  | KSAPATGGIK     | Me1(K27)          | 1 | 0.999974 |
| 27    | 36  | KSAPATGGIK     | Me1(K27)          | 2 | 0.998732 |
| 27    | 36  | KSAPATGGIK     | Me3(K27)          | 2 | 0.991533 |
| 28    | 36  | SAPATGGIK      |                   | 1 | 0.98837  |
| 27    | 40  | KSAPATGGIKKPHR | Ac(K27),Me2(K36)  | 2 | 0.992491 |
| 27    | 40  | KSAPATGGIKKPHR | Ac(K27),Me1(K36)  | 2 | 0.997828 |
| 27    | 40  | KSAPATGGIKKPHR | Ac(K27),Me1(K36)  | 3 | 0.98475  |
| 27    | 40  | KSAPATGGIKKPHR | Me2(K27),Me1(K36) | 2 | 0.996233 |
| 27    | 40  | KSAPATGGIKKPHR | Me1(K27),Me2(K36) | 2 | 0.996233 |
| 27    | 40  | KSAPATGGIKKPHR | Me1(K27),Me1(K36) | 2 | 0.995498 |
| 27    | 40  | KSAPATGGIKKPHR | Me1(K27),Me1(K36) | 3 | 0.98896  |
| 27    | 40  | KSAPATGGIKKPHR | Me1(K36)          | 2 | 0.999973 |
| 28    | 40  | SAPATGGIKKPHR  | Me2(K36)          | 2 | 0.991499 |
| 28    | 40  | SAPATGGIKKPHR  | Me1(K36)          | 2 | 0.998617 |
| 28    | 40  | SAPATGGIKKPHR  | Me1(K36)          | 3 | 0.98299  |
| 43    | 49  | PGTVALR        |                   | 1 | 0.997312 |
| 70    | 83  | LVRDIAHEFKAELR |                   | 2 | 0.9886   |
| 70    | 83  | LVRDIAHEFKAELR |                   | 3 | 0.99698  |
| 73    | 79  | DIAHEFK        |                   | 1 | 0.998278 |
| 73    | 79  | DIAHEFK        |                   | 2 | 0.992109 |
| 73    | 83  | DIAHEFKAELR    |                   | 1 | 0.999972 |
| 73    | 83  | DIAHEFKAELR    |                   | 2 | 0.993934 |
| 123   | 128 | DMQLAR         |                   | 1 | 0.95991  |
| 130   | 135 | IRGERF         |                   | 1 | 0.997647 |

**H3.3**

| Start | End | Sequence       | Modifications     | z | H/L      |
|-------|-----|----------------|-------------------|---|----------|
| 18    | 26  | KQLATKAAR      | Ac(K18,K23)       | 1 | 0.99997  |
| 18    | 26  | KQLATKAAR      | Me2(K23)          | 2 | 0.998306 |
| 27    | 36  | KSAPVSGGVK     | Me2(K27)          | 1 | 0.999977 |
| 27    | 36  | KSAPVSGGVK     | Me2(K27)          | 2 | 0.99104  |
| 27    | 36  | KSAPVSGGVK     | Me1(K27)          | 1 | 0.999979 |
| 27    | 36  | KSAPVSGGVK     | Me1(K27)          | 2 | 0.998358 |
| 27    | 36  | KSAPVSGGVK     |                   | 1 | 0.999959 |
| 27    | 36  | KSAPVSGGVK     |                   | 2 | 0.999973 |
| 27    | 40  | KSAPVSGGVKKPHK | Me1(K27),Me1(K36) | 2 | 0.999706 |
| 28    | 40  | SAPVSGGVKKPHK  | Me1(K36)          | 2 | 0.997124 |
| 57    | 63  | TTDLLIR        |                   | 1 | 0.997749 |

|    |    |         |   |          |
|----|----|---------|---|----------|
| 57 | 63 | TTDLLIR | 2 | 0.997586 |
| 73 | 79 | DIAMEMK | 1 | 0.98676  |

**Table S5. Peptides used in PCA analysis of 16 PTM sites in H3 and H3.3**

| Peptide ID | Modifications  | WT         | <i>TXR1</i> | p-value  | <i>EZL2</i> | p-value  | <i>TXR1</i> /WT | <i>EZL2</i> /WT |
|------------|----------------|------------|-------------|----------|-------------|----------|-----------------|-----------------|
| 1          | H3K4Me1        | 0.61(0.06) | 1.09(0.24)  | 0.01503  | 1.36(N/A)   | N/A      | 1.78            | 2.21            |
| 2          | H3K14Un        | 0.68(0.04) | 0.61(0.12)  | 0.022982 | 0.83(0.02)  | 0.88193  | 0.91            | 1.23            |
| 3          | H3K14Ac        | 1.17(0.31) | 1.45(0.22)  | 0.538428 | 1.22(N/A)   | N/A      | 1.24            | 1.05            |
| 4          | H3K18Ac        | 0.82(0.04) | 1.11(0.16)  | 0.669132 | 0.88(N/A)   | N/A      | 1.35            | 1.07            |
| 5          | H3K18AcK23Ac   | 0.95(0.05) | 1.34(0.19)  | 0.872236 | 1.12(0.22)  | 0.967862 | 1.41            | 1.18            |
| 6          | H3K23Ac        | 0.83(0.04) | 1.11(0.15)  | 0.685553 | 0.95(0.13)  | 0.394129 | 1.35            | 1.15            |
| 7          | H3K23Me1       | 0.52(0.13) | 1.32(0.25)  | 0.019933 | 1.55(0.47)  | 0.006643 | 2.52            | 2.97            |
| 8          | H3K18UnK23Un   | 1(0.06)    | 1.11(0.21)  | 0.126337 | 1.15(0.08)  | 0.967352 | 1.12            | 1.16            |
| 9          | H3K27Ac        | 0.82(0.08) | 1.23(0.21)  | 0.37916  | 0.94(0.29)  | 0.759725 | 1.5             | 1.15            |
| 10         | H3K27Me1*      | 1.12(0.05) | 0.21(0.03)  | 4.17E-05 | 1.94(0.27)  | 0.000358 | 0.18            | 1.73            |
| 11         | H3K27Me2       | 0.81(0.06) | 0.46(0.07)  | 0.000824 | 0.13(0.01)  | 0.001446 | 0.56            | 0.16            |
| 12         | H3K27Me3       | 0.52(0.02) | 0.47(0.1)   | 0.040226 | 0.1(0.024)  | 0.000263 | 0.92            | 0.2             |
| 13         | H3K27Me1K36Me1 | 0.65(0.07) | 0.07(0.02)  | 0.004257 | 0.78(0.19)  | 0.864776 | 0.11            | 1.2             |
| 14         | H3K27Me2K36Me1 | 0.48(0.06) | 0.49(0.01)  | 0.160328 | 0.50(0.15)  | 0.606316 | 0.86            | 0.94            |
| 15         | H3K27UnK36Un   | 1.83(0.38) | 5.7(0.91)   | 0.020405 | 2.37(0.61)  | 0.61335  | 3.12            | 1.3             |
| 16         | H3K56Un        | 1.03(0.12) | 1.15(0.16)  | 0.093877 | 1(N/A)      | N/A      | 1.11            | 0.97            |
| 17         | H3K56Me1       | 0.55(0.11) | 1.37(0.29)  | 0.019107 | 0.85(N/A)   | N/A      | 2.49            | 1.54            |
| 18         | H3R83Un        | 0.94(0.2)  | 1.18(0.17)  | 0.569269 | 1.1(0.01)   | 0.97823  | 1.26            | 1.17            |
| 19         | H3R83Me1       | 0.96(0.04) | 1.12(0.06)  | 0.675039 | 1.02(N/A)   | N/A      | 1.17            | 1.07            |
| 20         | H3.3K18AcK23Ac | 0.82(0.04) | 1.11(0.16)  | 0.677255 | 0.95(0.14)  | 0.008598 | 1.35            | 1.16            |
| 21         | H3.3K23Ac      | 1(0.06)    | 1.1(0.2)    | 0.118136 | 1.16(0.08)  | 0.25722  | 1.11            | 1.16            |
| 22         | H3.3K18UnK23Un | 0.49(0.11) | 1.23(0.32)  | 0.020046 | 1.59(0.48)  | 0.006213 | 2.53            | 3.26            |
| 23         | H3.3K56Ac      | 1.04(0.12) | 1.15(0.16)  | 0.093929 | 1.21(N/A)   | N/A      | 1.11            | 1.17            |

\*: The peptide,  $(_{2pr/me1})K^{27}SAPATGGI_{pr}K^{36}_{pr}K^{37}PHR$ , was used to calculate the ratio of K27Me1 as it was present in both  $\Delta TXR1$  and  $\Delta EZL2$  cells.

Note: Ratios in this table were normalized as described in the Materials and Methods. Species with significant p-values ( $p < 0.05$ ) are boxed.

## **Appendix:**

### **R code for PCA and Biplot analysis:**

```
PTM=read.table("H3PTM.txt",header=T)
#PCA analysis
pca.ptm<-princomp(PTM[,-1], scale=TRUE, center=TRUE, cor=F)
summary(pca.ptm)
loadings(pca.ptm)

#Print cumulative proportion of variance explained
cumprop=cumsum(pca.ptm$sdev^2)/sum(pca.ptm$sdev^2)
print(cumprop,digits=2)

#Screeplot
plot(pca.ptm, main="Screeplot of histone PTM data")

# Data projected on the first two PCs
plot(pca.ptm$scores[,1:2],type="n",xlab="1st PC",ylab="2nd PC")
text(pca.ptm$scores[,1:2],rownames(PTM))
title("Projection of PTM data to the subspace spanned by the first 2 PCs")

#Biplot of histone PTM data
biplot(pca.ptm)
title("Biplot of histone PTM data")
```
